# Supplementary material for: Halide anion solvation and recognition by a macrotricyclic tetraammonium host in an ionic liquid: a molecular dynamics study
Source: Royal Society of Chemistry journal article supplement (doi:10.1039/b518109g), 2006-01-01
Supplement: b518109g.pdf [file b518109g.pdf]

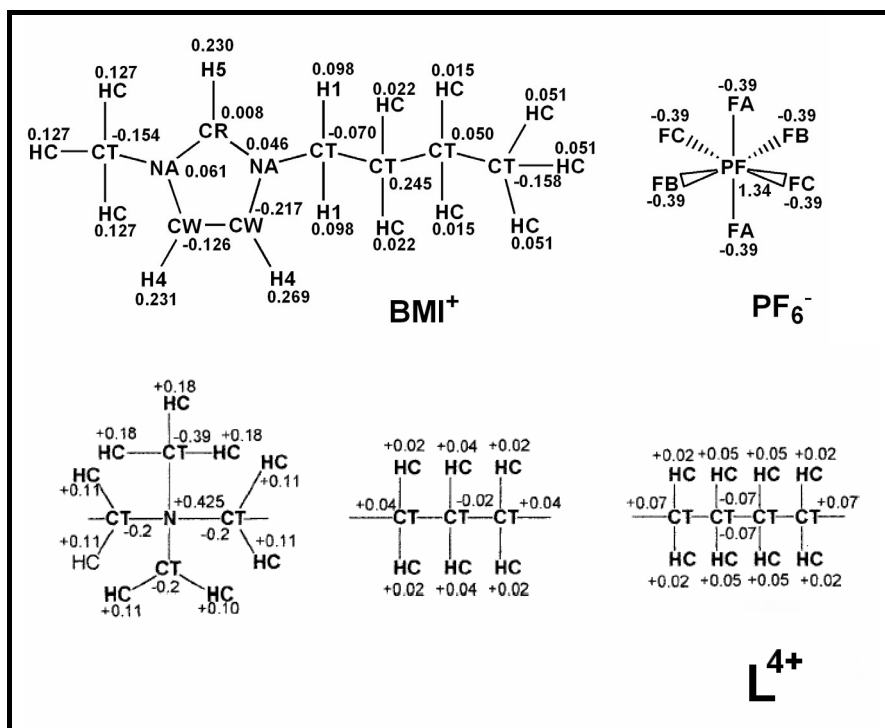

**Figure S1:** Atomic Charges and Amber Atom types of the simulated species.

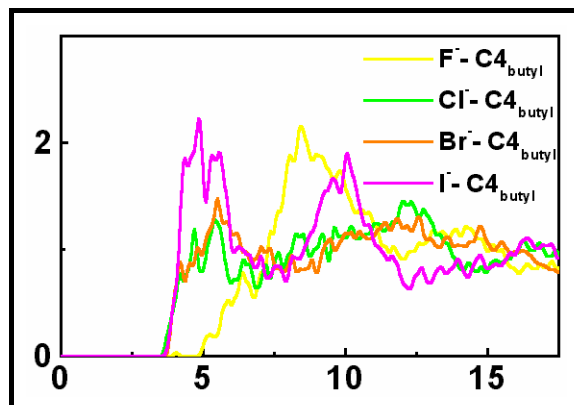

**Figure S2:** X<sup>-</sup> anions in dry [BMI][PF<sub>6</sub>] : Radial distribution function of C<sub>4</sub>(butyl) atoms around X<sup>-</sup>.
